# Supplementary material
Source: Springer Nature journal article supplement (https://www.springermedizin.de/resource/supplementary/12957_2012_1271_MOESM2_ESM.pdf/9562876)

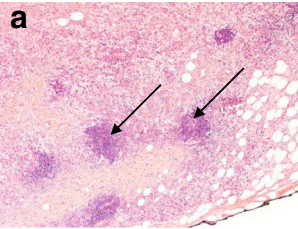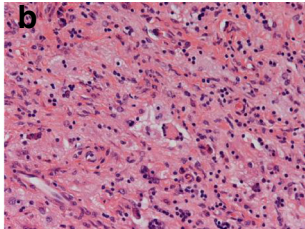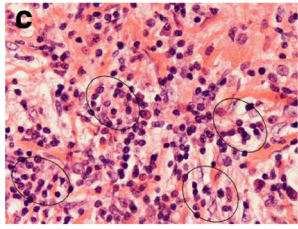

Supplement: MOESM2 [file 9562876]
